# Supplementary material
Source: HighWire-hosted journal article supplement (https://bmjopenquality.bmj.com/highwire/filestream/136110/field_highwire_adjunct_files/1/ds2182.docx)
Supplement: ds2182.docx [file ds2182.docx]

**PDSA Cycle [1]**

**Aim:** what are you trying to accomplish?

To see the feedback on using the amended form

**Plan:** what will your test be?

Feedback from junior doctors on the acceptability of the form

**Prediction:** what do you think will happen as a result of your test?

Hopefully it will be acceptable, and they will be happy to use it without issue.

**Do:** what happened when you carried out your test?

The juniors felt that there were a number of improvements that could be made to the form. Specifically they wanted the information regarding the criteria for harmful and hazardous drinking, and also activity levels to be included on the amended page.

**Study:** how did the results of your test compare with predictions?

It was not as accepted as had been expected

**Act:** how will you change your previous test in light of what you have learned?

I added onto the amended form their suggestions regarding the criteria.
